# Supplementary material
Source: PubMed Central journal article supplement (PMC3535548)
Supplement: NIHMS421175-supplement-Supp_FigureS1-S2_TableS1-S2.pdf [file NIHMS421175-supplement-Supp_FigureS1-S2_TableS1-S2.pdf]

## SUPPLEMENTARY MATERIAL

### Acetoacetyl-CoA synthetase activity is controlled by a protein acetyltransferase with unique domain organization in *Streptomyces lividans*

**Alex C. Tucker<sup>1</sup> and Jorge C. Escalante-Semerena<sup>2\*</sup>**

<sup>1</sup>Department of Bacteriology, University of Wisconsin  
1550 Linden Drive, Madison, WI 53706 USA

<sup>2</sup>Department of Microbiology, University of Georgia  
120 Cedar St, Athens, GA 30602 USA

Running title: lysine acetylation control of AacS in *Streptomyces*

**Table S1. Strains and plasmids used in this study.**

| Strain or Plasmid                           | Relevant Genotype                                                                                                                                                                                                                                                                                            | Reference                   |
|---------------------------------------------|--------------------------------------------------------------------------------------------------------------------------------------------------------------------------------------------------------------------------------------------------------------------------------------------------------------|-----------------------------|
| <i>E. coli</i> strains                      |                                                                                                                                                                                                                                                                                                              |                             |
| MG1655                                      | Wild type                                                                                                                                                                                                                                                                                                    |                             |
| HB101                                       | F <sup>-</sup> , <i>thi-1</i> , <i>hsdS20</i> (rB <sup>-</sup> , mB <sup>-</sup> ), <i>supE44</i> , <i>recA13</i> , <i>ara-14</i> , <i>leuB6</i> , <i>proA2</i> , <i>lacY1</i> , <i>galK2</i> , <i>rpsL20</i> ( <i>str</i> <sup>r</sup> ), <i>xyl-5</i> , <i>mtl-1</i>                                       | Promega                     |
| Stellar                                     | F <sup>-</sup> , <i>endA1</i> , <i>supE44</i> , <i>thi-1</i> , <i>recA1</i> , <i>relA1</i> , <i>gyrA96</i> , <i>phoA</i> , $\Phi 80d$ <i>lacZ</i> $\Delta M15$ , $\Delta(lacZYA - argF)$ U169, $\Delta(mrr - hsdRMS - mcrBC)$ , $\Delta mcrA$ , $\lambda^-$                                                  | Clonetech                   |
| JE6090                                      | C41 $\lambda$ (DE3)                                                                                                                                                                                                                                                                                          | Lab Collection              |
| JE9314                                      | C41 $\lambda$ (DE3) <i>pka12::kan</i> <sup>+</sup>                                                                                                                                                                                                                                                           | Lab Collection              |
| Derivatives of <i>E. coli</i> strain MG1655 |                                                                                                                                                                                                                                                                                                              |                             |
| JE15976                                     | $\Delta pka$ $\Delta cobB$ $\Delta atoDA$ / pBAD30 <i>bla</i> <sup>+</sup>                                                                                                                                                                                                                                   |                             |
| JE15977                                     | $\Delta pka$ $\Delta cobB$ $\Delta atoDA$ / pATO1 <i>bla</i> <sup>+</sup>                                                                                                                                                                                                                                    |                             |
| JE16068                                     | $\Delta pka$ $\Delta cobB$ $\Delta atoDA$ / pSIAacS4 <i>bla</i> <sup>+</sup>                                                                                                                                                                                                                                 |                             |
| JE16968                                     | $\Delta pka$ $\Delta cobB$ $\Delta atoDA$ / pSIAacS6 pSRK-Km <i>bla</i> <sup>+</sup> <i>kan</i> <sup>+</sup>                                                                                                                                                                                                 |                             |
| JE16969                                     | $\Delta pka$ $\Delta cobB$ $\Delta atoDA$ / pSIAacS6 pSIPatA9 <i>bla</i> <sup>+</sup> <i>kan</i> <sup>+</sup>                                                                                                                                                                                                |                             |
| Derivatives of JE17126                      |                                                                                                                                                                                                                                                                                                              |                             |
| JE17146                                     | $\Delta atoDA$ $\Delta pka$ / pSIAacS6 pSRK-Km <i>bla</i> <sup>+</sup> <i>kan</i> <sup>+</sup>                                                                                                                                                                                                               |                             |
| JE17147                                     | $\Delta atoDA$ $\Delta pka$ / pSIAacS6 SIPatA9 <i>bla</i> <sup>+</sup> <i>kan</i> <sup>+</sup>                                                                                                                                                                                                               |                             |
| Derivatives of HB101                        |                                                                                                                                                                                                                                                                                                              |                             |
| JE16095                                     | F <sup>-</sup> , <i>thi-1</i> , <i>hsdS20</i> (rB <sup>-</sup> , mB <sup>-</sup> ), <i>supE44</i> , <i>recA13</i> , <i>ara-14</i> , <i>leuB6</i> , <i>proA2</i> , <i>lacY1</i> , <i>galK2</i> , <i>rpsL20</i> ( <i>str</i> <sup>r</sup> ), <i>xyl-5</i> , <i>mtl-1</i> / pRK2013 <i>kan</i> <sup>+</sup>     | (Figurski & Helinski, 1979) |
| Derivatives of Stellar                      |                                                                                                                                                                                                                                                                                                              |                             |
| JE16376                                     | F <sup>-</sup> , <i>endA1</i> , <i>supE44</i> , <i>thi-1</i> , <i>recA1</i> , <i>relA1</i> , <i>gyrA96</i> , <i>phoA</i> , $\Phi 80d$ <i>lacZ</i> $\Delta M15$ , $\Delta(lacZYA - argF)$ U169, $\Delta(mrr - hsdRMS - mcrBC)$ , $\Delta mcrA$ , $\lambda^-$ / pKC1139- $\Delta patA$ <i>apr</i> <sup>+</sup> |                             |
| <i>S. lividans</i> strains                  |                                                                                                                                                                                                                                                                                                              |                             |
| TK24                                        | Wild type                                                                                                                                                                                                                                                                                                    |                             |
| Derivatives of <i>S. lividans</i> TK24      |                                                                                                                                                                                                                                                                                                              |                             |
| JE16707                                     | $\Delta patA$                                                                                                                                                                                                                                                                                                |                             |
| JE16752                                     | $\Delta EFD65580$ $\Delta EFD68590$ $\Delta EFD71509$                                                                                                                                                                                                                                                        |                             |
| JE16731                                     | TK24 / pSIAacS5 <i>tsr</i> <sup>+</sup>                                                                                                                                                                                                                                                                      |                             |

|                        |                                                                                                  |                                |
|------------------------|--------------------------------------------------------------------------------------------------|--------------------------------|
| JE16758                | $\Delta aacS$ (EFD70521)                                                                         |                                |
| Derivative of JE16707  |                                                                                                  |                                |
| JE16821                | $\Delta patA$ / pSIAacS5 $tsr^+$                                                                 |                                |
|                        |                                                                                                  |                                |
| <b>Plasmids</b>        |                                                                                                  |                                |
| pBAD30                 | $P_{araBAD}$ expression vector, $bla^+$                                                          |                                |
| pTEV5                  | N-terminal, rTEV-cleavable His <sub>6</sub> -tag overexpression vector, $bla^+$                  | (Rocco <i>et al.</i> , 2008)   |
| pSRK-Km                | $lac^{\rho}$ - $lac$ promoter-operator expression vector, $kan^+$                                | (Khan <i>et al.</i> , 2008)    |
| pSE34                  | $P_{ermE}$ constitutive expression vector, $bla^+ tsr^+$                                         | (Yoon <i>et al.</i> , 2002)    |
| pRK2013                | self-transmissible helper plasmid, $mob^+ tra^+ kan^+$                                           | (Figurski & Helinski, 1979)    |
| pKC1139                | Temperature-sensitive shuttle vector, $apr^+$                                                    | (Bierman <i>et al.</i> , 1992) |
| pACS10                 | <i>S. enterica aacS</i> <sup>+</sup> allele in pTYB1                                             | (Starai <i>et al.</i> , 2002)  |
| pATO1                  | <i>E. coli atoDA</i> allele in pBAD30, $bla^+$                                                   |                                |
| pSIAcs1                | <i>S. lividans aacS</i> <sup>+</sup> allele (EFD68454) in pTEV5, $bla^+$                         |                                |
| pSIAacS1               | <i>S. lividans aacS</i> <sup>+</sup> allele (EFD70521) in pTEV5, $bla^+$                         |                                |
| pSIAacS4               | <i>S. lividans aacS</i> <sup>+</sup> allele (EFD70521) in pBAD30, $bla^+$                        |                                |
| pSIAacS5               | <i>S. lividans aacS</i> <sup>+</sup> allele (EFD70521) in pSE34, $bla^+ tsr^+$                   |                                |
| pSIAacS6               | <i>E. coli</i> codon-optimized <i>S. lividans aacS</i> allele (EFD70521) in pBAD30, $bla^+$      |                                |
| pSIPatA1               | <i>S. lividans patA</i> <sup>+</sup> allele (EFD66247) in pTEV5, $bla^+$                         |                                |
| pSIPatA9               | <i>S. lividans patA</i> <sup>+</sup> allele (EFD66247) in pSRK-Km, $bla^+$                       |                                |
| pKC1139- $\Delta patA$ | deletion construct of <i>S. lividans patA</i> <sup>+</sup> allele (EFD66247) in pKC1139, $apr^+$ |                                |

\*Unless otherwise indicated, all strains and plasmids were constructed during the course of this work.

**Table S2. Primers used in this study**

| Name                          | Sequence                                                           |
|-------------------------------|--------------------------------------------------------------------|
| <i>atoDA</i> deletion primers |                                                                    |
| <i>atoDA</i> Wanner 5'        | ACCCACAACGGTGTATGCAAGAGGGATAAAAAATGAAAACGTG<br>TAGGCTGGAGCTGCTTC   |
| <i>atoDA</i> Wanner 3'        | CGCGATATGCGACCAATCATAAATCACCCCGTTGCGTATTCAT<br>ATGAATATCCTCCTTAG   |
|                               |                                                                    |
| Cloning primers               |                                                                    |
| <i>atoDA</i> + EcoRI 5'       | GCAGAATTCACGGTGTATGCAAGAGGGAT                                      |
| <i>atoDA</i> + KpnI 3'        | GCCGGTACCCCGGCTGACAAAACGCGTC                                       |
| SIaCS pTEV 5 5'               | GTAGCTAGCATGAGCAACGAATCCTTGGCCAAC                                  |
| SIaCS pTEV 5 3'               | ACTGAATTCGCCTGTGGCCGGCTCAGTC                                       |
| SIaCS pTEV 5 3'               | TCGGAATTCGCTGCTCAGGAGCGCTTG                                        |
| SIaCS pBAD30 5'               | GGAGAATTCAGGAGGACAGCTATGTCGACCGAGAACCCAC                           |
| SIaCS pBAD30 3'               | TCGAAGCTTGCTGCTCAGGAGCGCTTG                                        |
| SIaCS (opt) 5'                | GGAGAATTCAGGAGGACAGCTATGTCGACCGAAAACCCGC                           |
| SIaCS (opt) 3'                | ACTGGTACCTCAAGAGCGTTTGCGTGCC                                       |
| SIaCS 5' XbaI pSE34           | GCCTCTAGACCGGGAGCCGCCCATGCACCACCACCACCAC<br>CACATGTCGACCGAGAACCCAC |
| SIaCS 3' HindIII pSE34        | TCGAAGCTTGCTGCTCAGGAGCGCTTG                                        |
| PatA 5' pTEV5 NheI            | GTAGCTAGCATGTCGTACGCGAGCCGTA CTCTGG                                |
| PatA 3' pTEV5 EcoRI           | ACTGAATTCGGTCAGTAGGCCGGCAGGGTC                                     |
| PatA 5' pSRK-Km NdeI          | GCTCATATGTCGTACGCGAGCCGTA CTCT                                     |
| PatA 3' pSRK-Km KpnI          | ACTGGTACCTCAGTAGGCCGGCAGGGTC                                       |
| SIREVPat 5' EcoRV IF          | CTATGACATGATTACGAATTCGATATCGGCCTAGAGTCGCTGA<br>AAGC                |
| SIREVPat R linker BamHI       | CGTGGCGGGTCAGTAGGCCGGATCCCCTGCTCGTAGAAGCT<br>GACC                  |
| SIREVPat F linker BamHI       | GGTCAGCTTCTACGAGCAGGGGATCCGGCCTACTGACCCGCC<br>ACG                  |
| SIREVPat 3' HindIII IF        | TGTA AACGACGGCCAGTGCCAAGCTTGTCCTCGTCGAAATC<br>GTCCGGTG             |

Bold typeface indicates restriction sites

## Supplemental figures

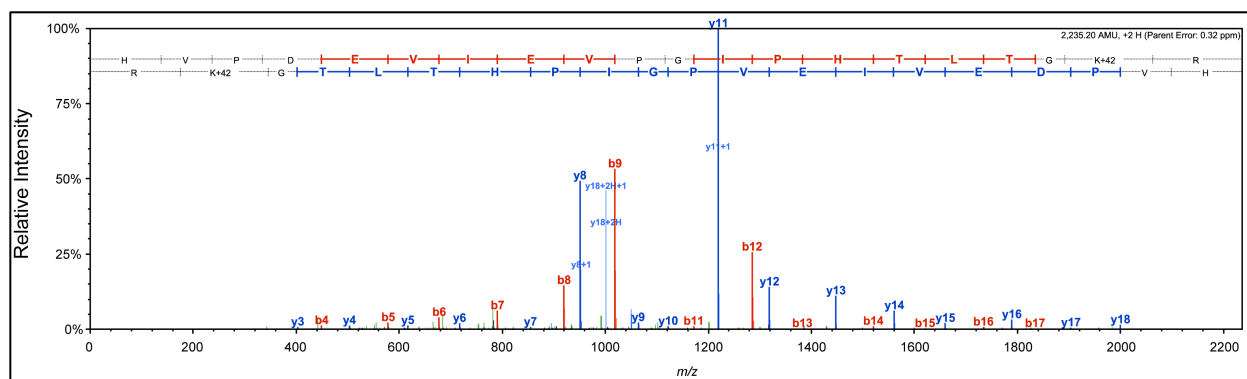

**Figure S1. Residue K617 is the site of SIAacS acetylation in vivo.** LC/MS-MS analysis of H6-SIAacS protein isolated from *S. lividans* strain JE16731 (*S. lividans* TK24 / pSIAacS5) grown in NMMP medium supplemented with acetoacetate (10 mM). MS/MS spectrum of the 2235.20 amu tryptic peptide, where peaks in red represent the b series  $m/z$  (predicted fragment ion masses of HVPDEVIEVPGIPHTLTGKAcR with charge on the N-terminal amino acid), and the blue peaks indicate y series  $m/z$  (predicted fragment ion masses of HVPDEVIEVPGIPHTLTGK<sup>Ac</sup>R) with the charge on the carboxy-terminal amino acid). The y (blue) series suggests the presence of a 42 atomic mass unit addition to the HVPDEVIEVPGIPHTLTGKR fragments, specifically within the final three amino acids, GKR.

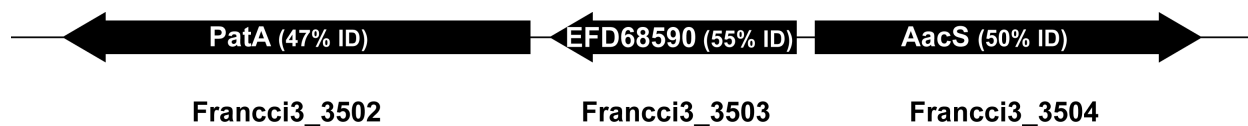

**Figure S2. SIAacS gene cluster in Frankia sp. Ccl3 suggests a candidate deacetylase for SIAacS.** *Frankia* sp. Ccl3 encodes a SIPatA, SIAacS, and EFD68590 homologs in a gene cluster. Percent identity (% ID) to the respective *S. lividans* homologs is reported. The figure is drawn to scale.

## References

- Bierman, M., R. Logan, K. O'Brien, E. T. Seno, R. N. Rao & B. E. Schoner, (1992) Plasmid cloning vectors for the conjugal transfer of DNA from *Escherichia coli* to *Streptomyces* spp. *Gene* **116**: 43-49.
- Figurski, D. H. & D. R. Helinski, (1979) Replication of an origin-containing derivative of plasmid RK2 dependent on a plasmid function provided in trans. *Proc. Natl. Acad. Sci.* **76**: 1648-1652.
- Khan, S. R., J. Gaines, R. M. Roop, 2nd & S. K. Farrand, (2008) Broad-host-range expression vectors with tightly regulated promoters and their use to examine the influence of TraR and TraM expression on Ti plasmid quorum sensing. *Appl. Environ. Microbiol.* **74**: 5053-5062.
- Rocco, C. J., K. L. Dennison, V. A. Klenchin, I. Rayment & J. C. Escalante-Semerena, (2008) Construction and use of new cloning vectors for the rapid isolation of recombinant proteins from *Escherichia coli*. *Plasmid* **59**: 231-237.
- Starai, V. J., I. Celic, R. N. Cole, J. D. Boeke & J. C. Escalante-Semerena, (2002) Sir2-dependent activation of acetyl-CoA synthetase by deacetylation of active lysine. *Science* **298**: 2390-2392.
- Yoon, Y. J., B. J. Beck, B. S. Kim, H. Y. Kang, K. A. Reynolds & D. H. Sherman, (2002) Generation of multiple bioactive macrolides by hybrid modular polyketide synthases in *Streptomyces venezuelae*. *Chem. Biol.* **9**: 203-214.
